# Supplementary material
Source: PubMed Central journal article supplement (PMC1276705)
Supplement: 7600821s2.pdf [file 7600821s2.pdf]

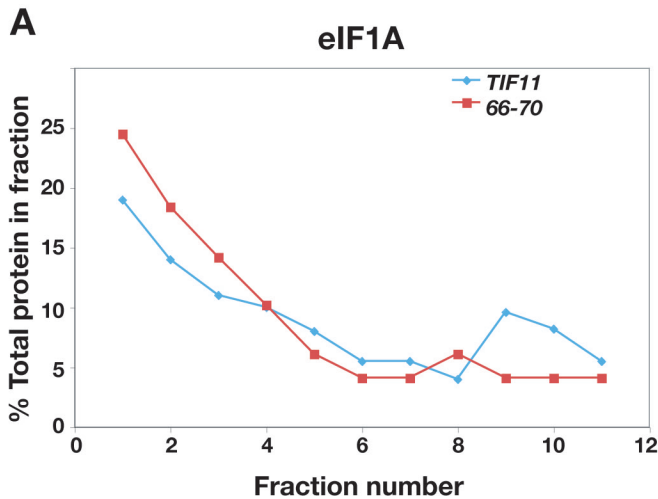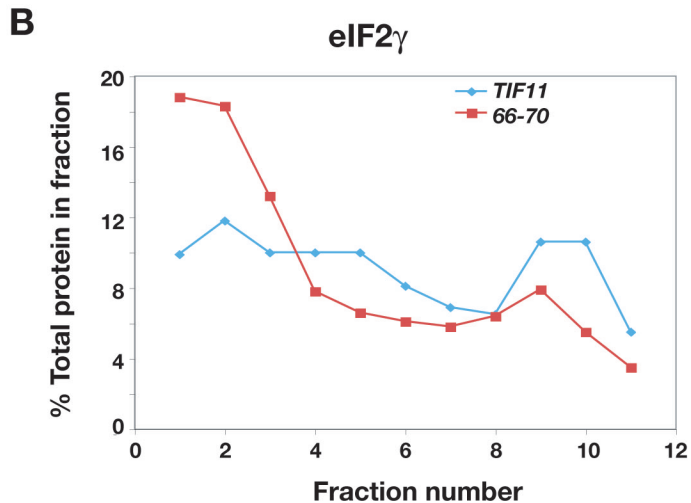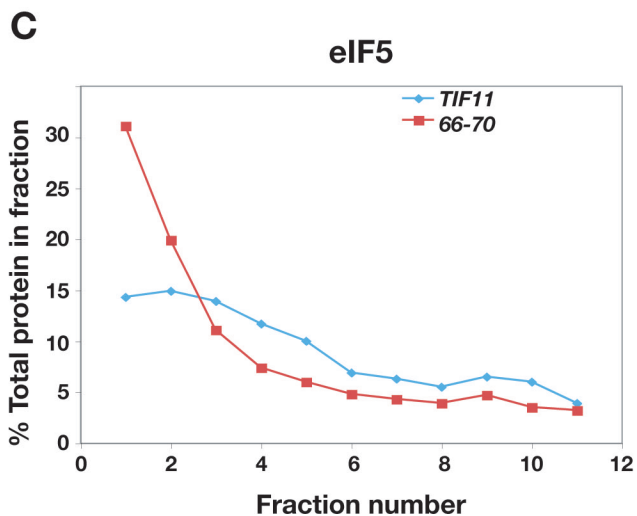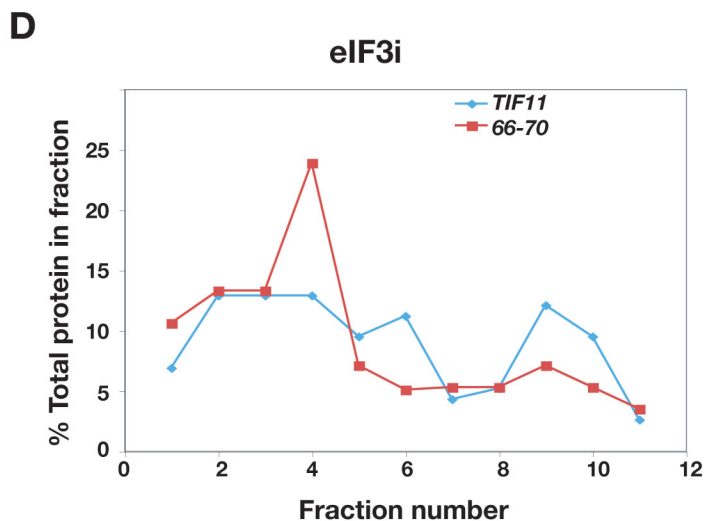

**Figure S1:** Distribution of initiation factors throughout the gradient in TIF11 (H2999) and 66-70 (H3580) strains (from Figure 2D). The total pixel density from 11 fractions (determined using NIH Image) was summed and used to calculate the percentage of eIF1A (A), eIF2 (B), eIF5 (C) and eIF3i (D) in each fraction. The results are presented as % total protein in each fraction and are representative of 2 independent experiments.
