# Supplementary material
Source: PubMed Central journal article supplement (PMC1276705)
Supplement: 7600821s5.pdf [file 7600821s5.pdf]

Table S1: Primers used for eIF1A mutagenesis<sup>1</sup>

| Name  | Sequence                                                                             | Mutation                                          |
|-------|--------------------------------------------------------------------------------------|---------------------------------------------------|
| CHA85 | GATGACGATGACAAAagatccGcTgctgctgctgct<br>AAAGGTGGTAAAAAAGGTAGAAGAGG                   | <i>GKKNT</i> <sub>2-</sub><br><i>6AAAAA</i>       |
| CHA86 | CCTTTTTTACCACCTTTtagcagcagcagcAgCggatc<br>TTTTGTCATCGTCATCTTTATAATCAG                | <i>GKKNT</i> <sub>2-</sub><br><i>6AAAAA</i>       |
| CHA87 | GACAAAagatccGGTAAGAAAAACACTgctGcTGcT<br>gctgctGGTAGAAGAGGTAAGAACGACTCTG              | <i>KGGKK</i> <sub>7-11</sub> <i>AAAAA</i>         |
| CHA88 | CGTTCTTACCTCTTCTACCagcagcAgCagCagc<br>AGTGTTTTTCTTACCggatcTTTTGTCATCGTCATC           | <i>KGGKK</i> <sub>7-11</sub> <i>AAAAA</i>         |
| CHA89 | GGTAAGAAAAACACTAAAGGTGGTAAAAAAGcT<br>gctgctGcTgctAACGACTCTGACGGTCCAAAGCG             | <i>GRRGK</i> <sub>12-</sub><br><i>16AAAAA</i>     |
| CHA90 | CTTTGGACCATCAGAGTCGTTtagcAgCagcagcAgCT<br>TTTTTACCACCTTTAGTGTTTTTCTTACCGG            | <i>GRRGK</i> <sub>12-</sub><br><i>16AAAAA</i>     |
| CHA91 | GGTGGTAAAAAAGGTAGAAGAGGTAAAgctGctgCT<br>GctGcTCCAAAGCGTGAACCTATTTATAAGGAAGA<br>AGGCC | <i>NDSGD</i> <sub>17-</sub><br><i>21AAAAA</i>     |
| CHA92 | GGCCTTCTTCCTTATAAATAAGTTCACGCTTTGGA<br>gCagCAGcagCagcTTTACCTCTTCTACCTTTTTTACC<br>ACC | <i>NDSGD</i> <sub>17-</sub><br><i>21AAAAA</i>     |
| CHA93 | GAGGTAAGAACGACTCTGACGGTgctgctgcTgctgcTg<br>cTgcTAAGGAAGAAGGCCAAGAATATGCTC            | <i>PKRELIY</i> <sub>22-</sub><br><i>28AAAAAAA</i> |
| CHA94 | GAGCATATTCTTGGCCTTCTTCCTTAgcAgcAgcagC<br>AgcagcagcACCGTCAGAGTCGTTCTTACCTC            | <i>PKRELIY</i> <sub>22-</sub><br><i>28AAAAAAA</i> |
| CHA81 | CGGTCCAAAGCGGGAACCTATTTAcgcGGctGctGctC<br>AAGctTATGCTCAAATCACCAAGATG                 | <i>KEEGQE</i> <sub>29-</sub><br><i>34AAAAQA</i>   |
| CHA82 | CATCTTGGTGATTTGAGCATAagCTTGagCagCagCCg<br>cgTAAATAAGTTCcCGCTTTGGACCG                 | <i>KEEGQE</i> <sub>29-</sub><br><i>34AAAAQA</i>   |
| CHA83 | GAATATGCTCAAATCACCAAGgctTTaGcTgcT<br>GGAAGAGTCGAgGCCAGTTGC                           | <i>MLGN</i> <sub>41-</sub><br><i>44ALAA</i>       |
| CHA84 | GCAACTGGCcTCGACTCTTCCAgcAgCtAAagcCTTG<br>GTGATTTGAGCATATTCTTGG                       | <i>MLGN</i> <sub>41-</sub><br><i>44ALAA</i>       |
| CHA79 | GCTCAGATCACTAAGATGTTGGGTAATGctgctGTC                                                 | <i>GRVE</i> <sub>45-</sub>                        |

| Name   | Sequence                                                                   | Mutation                                     |
|--------|----------------------------------------------------------------------------|----------------------------------------------|
|        | GtcGCCAGTTGCTTTGATGGTAATAAG                                                | <i>48AAVA</i>                                |
| CHA80  | CTTATTACCATCAAAGCAACTGGCgaCGACagcagCA<br>TTACCCAACATCTTAGTGATCTGAGC        | <i>GRVE<sub>45-</sub></i><br><i>48AAVA</i>   |
| CHA77  | GGAAGAGTCGAAACCAGTTGCTTTGcTGcg<br><br>AATgctAGAATGGCCCATATTAGAGGTAAG       | <i>DGNK<sub>53-</sub></i><br><i>56AANA</i>   |
| CHA78  | CCTCTAATATGGGCCATTCTagcATTcgCagCAAAGC<br>AACTGGTTTCGACTCTTCCATTACC         | <i>DGNK<sub>53-</sub></i><br><i>56AANA</i>   |
| CHA156 | GATGGTAATAAGAGAATGGCCCATATTgatGGTAA<br>GTTAAGAAAGAAAGTCTGG                 | <i>R<sub>62</sub>D</i>                       |
| CHA157 | CCAGACTTTCTTTCTTAACTTACCatcAATATGGGC<br>CATTCTCTTATTACCATC                 | <i>R<sub>62</sub>D</i>                       |
| CHA73  | GGCTCATATTAGAGGTAAGTTGgctgctgctGTCgctAT<br>GGGTCAGGGTGATATTATTCTTGTTTCC    | <i>RKKVW<sub>66-</sub></i><br><i>70AAAVA</i> |
| CHA74  | CACCCTGACCCATagcGACagcagcagcCAACTTACCT<br>CTAATATGAGCCATTCTCTTATTACC       | <i>RKKVW<sub>66-</sub></i><br><i>70AAAVA</i> |
| CHA71  | GGTGATATTATTCTTGTTTCCTTAgetGcTgetgctGcTG<br>ACCAATGTGATGTTGTCCAC           | <i>RDFQD<sub>82-</sub></i><br><i>86AAAAA</i> |
| CHA72  | GTGaACAACATCACATTGGTCagCagcagcAgCagcTA<br>AGGAAACAAGAATAATATCACCTgtgccc    | <i>RDFQD<sub>82-</sub></i><br><i>86AAAAA</i> |
| CHA69  | GACCAATGTGATGTTGTCCACgctTATgcTTTAGATG<br>ACGCCAGAACACTG                    | <i>KYN<sub>94-</sub></i><br><i>96AYA</i>     |
| CHA70  | CAGTGTTCTGGCGTCATCTAAAgcATAagcGTGGAC<br>AACATCACATTGGTC                    | <i>KYN<sub>94-</sub></i><br><i>96AYA</i>     |
| CHA67  | CCACAAATATAATTTAGcTGctGCCgctACACTGAAA<br>AACCAAGGTGAACTTCC                 | <i>DEAR<sub>98-</sub></i><br><i>101AAAA</i>  |
| CHA68  | CCTTGGTTTTTCAGTGTtagcGGCagCAgCTAAATTAT<br>ACTTATGGACAACATCACATTGGTCATCTTGG | <i>DEAR<sub>98-</sub></i><br><i>101AAAA</i>  |
| CHA65  | GAAGCTAGAACACTGgctgctCAAGGTGAACTTCCT<br>GAAAACG                            | <i>KN<sub>104-</sub></i><br><i>105AA</i>     |

| Name         | Sequence                                                                    | Mutation                                               |
|--------------|-----------------------------------------------------------------------------|--------------------------------------------------------|
| CHA66        | CAGGAAGTTCACCTTGagcagcCAGTGTTCTAGCTTC<br>ATCTAAATTATATTTG                   | <i>KN</i> <sub>104-</sub><br><i>105AA</i>              |
| CHA63        | CTGAAAAACCAGGGTGAACCTTgCTGctAACGCCAA<br>AATTAATGAAAC                        | <i>PE</i> <sub>110-</sub><br><i>111AA</i>              |
| CHA64        | GTTTCATTAATTTTGGCGTTagCAGcAAGTTCACCC<br>TGGTTTTTCAG                         | <i>PE</i> <sub>110-</sub><br><i>111AA</i>              |
| CHA61        | CTTCCTGAAAACGCTAAGATTgcTGctACAGACAAC<br>TTTGGTTTTCG                         | <i>NE</i> <sub>116-</sub><br><i>117AA</i>              |
| CHA62        | CCGAAGTTGTCTGTtagCAGcAATTTTGGCGTTTTCA<br>GGAAGTTCACC                        | <i>NE</i> <sub>116-</sub><br><i>117AA</i>              |
| CHA162       | CCTGAAAACGCCAAAATTAATGAAgCtGctgctgctGcT<br>TTCGAATCTGATGAAGACGTTAACTTTG     | <i>TDNFG</i> <sub>118-</sub><br><i>122AAAAA</i>        |
| CHA163       | CAAAGTTAACGTCTTCATCAGATTCGAAAgCagcag<br>cagCaGcTTCATTAATTTTGGCGTTTTTCAGG    | <i>TDNFG</i> <sub>118-</sub><br><i>122AAAAA</i>        |
| CHA164       | CCAAAATTAATGAAACAGACAACCTTTGGTgctGctgC<br>TGcTGctGACGTTAACTTTGAATTTGGTAACGC | <i>FESDE</i> <sub>123-</sub><br><i>127AAAAA</i>        |
| CHA165       | GCGTTACCAAATTCAAAGTTAACGTCagCagCAGca<br>gCagcACCAAAGTTGTCTGTTTCATTAATTTTGG  | <i>FESDE</i> <sub>123-</sub><br><i>127AAAAA</i>        |
| CHA166       | CAACTTTGGTTTTCGAATCTGATGAAGctGcTgctgC<br>ctTTTGGTAACGCTGATGAAGATGATGAGG     | <i>DVNFE</i> <sub>128-</sub><br><i>132AAAAA</i>        |
| CHA167       | CCTCATCATCTTCATCAGCGTTACCAAagCagcagc<br>AgCagCTTCATCAGATTCGAAACCAAAGTTG     | <i>DVNFE</i> <sub>128-</sub><br><i>132AAAAA</i>        |
| TIF11-<br>28 | AATCTGATGAAGACGTTAACgcTGAAgcccGGCAAC<br>GCTGATGAAGATGATGA                   | <i>F</i> <sub>131A</sub> ,<br><i>F</i> <sub>133A</sub> |
| TIF11-<br>29 | ATGCGGCCGCTCTAGATACCTCGGGAA                                                 | <i>F</i> <sub>131A</sub> ,<br><i>F</i> <sub>133A</sub> |
| CHA168       | CGAATCTGATGAAGACGTTAACTTTGAAgcTGcTgct<br>GCTGcTGAAGATGATGAGGAAGGTGAAGATG    | <i>FGNAD</i> <sub>133-</sub><br><i>137AAAAA</i>        |
| CHA169       | CATCTTCACCTTCCTCATCATCTTCagCAGCagcAgC<br>AgcTTCAAAGTTAACGTCTTCATCAGATTCG    | <i>FGNAD</i> <sub>133-</sub><br><i>137AAAAA</i>        |
| CHA170       | CGTTAACTTTGAATTTGGTAACGCTGATGctGcTGc                                        | <i>EDDEE</i> <sub>138-</sub>                           |

| Name   | Sequence                                                                 | Mutation                                   |
|--------|--------------------------------------------------------------------------|--------------------------------------------|
|        | TGctGctGGTGAAGATGAAGAACTTGATATTG                                         | <i>142AAAAA</i>                            |
| CHA171 | CAATATCAAGTTCTTCATCTTCACCagCagCAgCAG<br>CagCATCAGCGTTACCAAATTCAAAGTTAACG | <i>EDDEE<sub>138-</sub><br/>142AAAAA</i>   |
| CHA172 | CGCTGATGAAGATGATGAGGAAGcTGctGcTGctGctg<br>cTGATATTGATGACATTTAATTTAGGCCG  | <i>GEDEEL<sub>143-</sub><br/>148AAAAAA</i> |
| CHA173 | CGGCCTAAATTAATGTCATCAATATCAgcagCagC<br>AgCagCAgCTTCCTCATCATCTTCATCAGCG   | <i>GEDEEL<sub>143-</sub><br/>148AAAAAA</i> |
| CHA144 | GGTGAAGATGAAGAACTTGcTgcTGcTGcCgcTTAAT<br>TTAGGCCGAACAAGTG                | <i>DIDDI<sub>149-</sub><br/>153AAAAA</i>   |
| CHA145 | CACTTGTTTCGGCCTAAATTAAGcGgCAgCAgcAgCA<br>AGTTCTTCATCTTCACC               | <i>DIDDI<sub>149-</sub><br/>153AAAAA</i>   |

<sup>1</sup>Mutated positions are in lower case
