# Supplementary material
Source: PubMed Central journal article supplement (PMC1276705)
Supplement: 7600821s6.pdf [file 7600821s6.pdf]

Table S2: Additional plasmids used in this study

| Plasmid | Description                                                                               |
|---------|-------------------------------------------------------------------------------------------|
| pCF73   | sc <i>LEU2 tif11-GKKNT</i> <sub>2-6</sub> <i>AAAAA-FL</i> in YCplac111                    |
| pCF84   | sc <i>LEU2 tif11-KGGKK</i> <sub>7-11</sub> <i>AAAAA-FL</i> in YCplac111                   |
| pCF85   | sc <i>LEU2 tif11-GRRGK</i> <sub>12-16</sub> <i>AAAAA-FL</i> in YCplac111                  |
| pCF74   | sc <i>LEU2 tif11-NDSDG</i> <sub>17-21</sub> <i>AAAAA-FL</i> in YCplac111                  |
| pCF75   | sc <i>LEU2 tif11-PKRELIY</i> <sub>22-28</sub> <i>AAAAAAA-FL</i> in YCplac111              |
| pCF71   | sc <i>LEU2 tif11-KEEGQE</i> <sub>29-34</sub> <i>AAAAAAA-FL</i> in YCplac111               |
| pCF72   | sc <i>LEU2 tif11-MLGN</i> <sub>41-44</sub> <i>ALAA-FL</i> in YCplac111                    |
| pCF70   | sc <i>LEU2 tif11-GRVE</i> <sub>45-48</sub> <i>AAVA-FL</i> in YCplac111                    |
| pCF44   | hc <i>LEU2 tif11-DGNK</i> <sub>53-56</sub> <i>AANA-FL</i> in YEplac181                    |
| pCF87   | sc <i>LEU2 tif11-R</i> <sub>62</sub> <i>D-FL</i> in YCplac111                             |
| pCF68   | sc <i>LEU2 tif11-RDFQD</i> <sub>82-86</sub> <i>AAAAA-FL</i> in YCplac111                  |
| pCF67   | sc <i>LEU2 tif11-KYN</i> <sub>94-96</sub> <i>AYA-FL</i> in YCplac111                      |
| pCF65   | sc <i>LEU2 tif11-KN</i> <sub>104-105</sub> <i>AA-FL</i> in YCplac111                      |
| pCF64   | sc <i>LEU2 tif11-PE</i> <sub>110-111</sub> <i>AA-FL</i> in YCplac111                      |
| pCF107  | sc <i>LEU2 tif11-NE</i> <sub>116-117</sub> <i>AA-FL</i> in YCplac111                      |
| pCF101  | sc <i>LEU2 tif11-TDNFG</i> <sub>118-122</sub> <i>AAAAA-FL</i> in YCplac111                |
| pCF102  | sc <i>LEU2 tif11-FESDE</i> <sub>123-127</sub> <i>AAAAA-FL</i> in YCplac111                |
| pCF103  | sc <i>LEU2 tif11-DVNFE</i> <sub>128-132</sub> <i>AAAAA-FL</i> in YCplac111                |
| p3504   | sc <i>LEU2 tif11-F</i> <sub>131</sub> <i>A, F</i> <sub>133</sub> <i>A-FL</i> in YCplac111 |
| pCF104  | sc <i>LEU2 tif11-FGNAD</i> <sub>133-137</sub> <i>AAAAA-FL</i> in YCplac111                |
| pCF105  | sc <i>LEU2 tif11-EDDEE</i> <sub>138-142</sub> <i>AAAAA-FL</i> in YCplac111                |
| pCF106  | sc <i>LEU2 tif11-GEDEEL</i> <sub>143-148</sub> <i>AAAAAAA-FL</i> in YCplac111             |

---

| Plasmid | Description                                                       |
|---------|-------------------------------------------------------------------|
| pCF94   | sc <i>LEU2 tif11-DIDDI<sub>149-153</sub>AAAAA-FL</i> in YCplac111 |

---
