# Supplementary material
Source: PubMed Central journal article supplement (PMC1276705)
Supplement: 7600821s7.pdf [file 7600821s7.pdf]

Table S3: Additional yeast strains used in this study

| Strain | Genotype                                                                                                                                                                        |
|--------|---------------------------------------------------------------------------------------------------------------------------------------------------------------------------------|
| CFY175 | <i>MATa ura3-52 leu2-3 leu2-112 trp1Δ63 gcn2Δ tif11Δ &lt;GCN4-lacZ, TRP1&gt;</i><br>pCF73 (sc <i>tif11-GKKNT<sub>2-6</sub>AAAAA-FL, LEU2</i> )                                  |
| CFY97  | <i>MATa ura3-52 leu2-3 leu2-112 trp1Δ63 gcn2Δ tif11Δ &lt;GCN4-lacZ, TRP1&gt;</i><br>pCF84 (sc <i>tif11-KGGKK<sub>7-11</sub>AAAAA-FL, LEU2</i> ) p3392 (sc <i>TIF11, URA3</i> )  |
| CFY99  | <i>MATa ura3-52 leu2-3 leu2-112 trp1Δ63 gcn2Δ tif11Δ &lt;GCN4-lacZ, TRP1&gt;</i><br>pCF85 (sc <i>tif11-GRRGK<sub>12-16</sub>AAAAA-FL, LEU2</i> ) p3392 (sc <i>TIF11, URA3</i> ) |
| CFY177 | <i>MATa ura3-52 leu2-3 leu2-112 trp1Δ 63 gcn2Δ tif11Δ &lt;GCN4-lacZ, TRP1&gt;</i><br>pCF74 (sc <i>tif11-NDSGD<sub>17-21</sub>AAAAA-FL, LEU2</i> )                               |
| CFY179 | <i>MATa ura3-52 leu2-3 leu2-112 trp1Δ 63 gcn2Δ tif11Δ &lt;GCN4-lacZ, TRP1&gt;</i><br>pCF75 (sc <i>tif11-PKRELIY<sub>22-28</sub>AAAAAAA-FL, LEU2</i> )                           |
| CFY171 | <i>MATa ura3-52 leu2-3 leu2-112 trp1Δ 63 gcn2Δ tif11Δ &lt;GCN4-lacZ, TRP1&gt;</i><br>pCF71 (sc <i>tif11-KEEGQE<sub>29-34</sub>AAAAAA-FL, LEU2</i> )                             |
| CFY173 | <i>MATa ura3-52 leu2-3 leu2-112 trp1Δ63 gcn2Δ tif11Δ &lt;GCN4-lacZ, TRP1&gt;</i><br>pCF72 (sc <i>tif11-MLGN<sub>41-44</sub>ALAA-FL, LEU2</i> )                                  |
| CFY169 | <i>MATa ura3-52 leu2-3 leu2-112 trp1Δ63 gcn2Δ tif11Δ &lt;GCN4-lacZ, TRP1&gt;</i><br>pCF70 (sc <i>tif11-GRVE<sub>45-48</sub>AAVA-FL, LEU2</i> )                                  |
| CFY119 | <i>MATa ura3-52 leu2-3 leu2-112 trp1Δ63 gcn2Δ tif11Δ &lt;GCN4-lacZ, TRP1&gt;</i><br>pCF44 (hc <i>tif11-DGNK<sub>53-56</sub>AANA-FL, LEU2</i> )                                  |
| CFY391 | <i>MATa ura3-52 leu2-3 leu2-112 trp1Δ63 gcn2Δ tif11Δ &lt;GCN4-lacZ, TRP1&gt;</i><br>pCF87 (sc <i>tif11-R<sub>62</sub>D-FL, LEU2</i> )                                           |
| CFY115 | <i>MATa ura3-52 leu2-3 leu2-112 trp1Δ63 gcn2Δ tif11Δ &lt;GCN4-lacZ, TRP1&gt;</i><br>pCF68 (sc <i>tif11-RDFQD<sub>82-86</sub>AAAAA-FL, LEU2</i> )                                |
| CFY165 | <i>MATa ura3-52 leu2-3 leu2-112 trp1Δ63 gcn2Δ tif11Δ &lt;GCN4-lacZ, TRP1&gt;</i><br>pCF67 (sc <i>tif11-KYN<sub>94-96</sub>AYA-FL, LEU2</i> )                                    |
| CFY161 | <i>MATa ura3-52 leu2-3 leu2-112 trp1Δ63 gcn2Δ tif11Δ &lt;GCN4-lacZ, TRP1&gt;</i><br>pCF65 (sc <i>tif11-KN<sub>104-105</sub>AA-FL, LEU2</i> )                                    |
| CFY159 | <i>MATa ura3-52 leu2-3 leu2-112 trp1Δ63 gcn2Δ tif11Δ &lt;GCN4-lacZ, TRP1&gt;</i><br>pCF64 (sc <i>tif11-PE<sub>110-111</sub>AA-FL, LEU2</i> )                                    |

| Strain | Genotype                                                                                                                                                 |
|--------|----------------------------------------------------------------------------------------------------------------------------------------------------------|
| CFY105 | <i>MATa ura3-52 leu2-3 leu2-112 trp1Δ63 gcn2Δ tif11Δ &lt;GCN4-lacZ, TRP1&gt;</i><br>pCF107 (sc <i>tif11-NE<sub>116-117</sub>AA-FL, LEU2</i> )            |
| CFY609 | <i>MATa ura3-52 leu2-3 leu2-112 trp1Δ63 gcn2Δ tif11Δ &lt;GCN4-lacZ, TRP1&gt;</i><br>pCF101 (sc <i>tif11-TDNFG<sub>118-122</sub>AAAAA-FL, LEU2</i> )      |
| CFY611 | <i>MATa ura3-52 leu2-3 leu2-112 trp1Δ63 gcn2Δ tif11Δ &lt;GCN4-lacZ, TRP1&gt;</i><br>pCF102 (sc <i>tif11-FESDE<sub>123-127</sub>AAAAA-FL, LEU2</i> )      |
| CFY613 | <i>MATa ura3-52 leu2-3 leu2-112 trp1Δ63 gcn2Δ tif11Δ &lt;GCN4-lacZ, TRP1&gt;</i><br>pCF103 (sc <i>tif11-DVNFE<sub>128-132</sub>AAAAA-FL, LEU2</i> )      |
| CFY615 | <i>MATa ura3-52 leu2-3 leu2-112 trp1Δ63 gcn2Δ tif11Δ &lt;GCN4-lacZ, TRP1&gt;</i><br>p3504 (sc <i>tif11-F<sub>131</sub>A, F<sub>133</sub>A-FL, LEU2</i> ) |
| CFY617 | <i>MATa ura3-52 leu2-3 leu2-112 trp1Δ63 gcn2Δ tif11Δ &lt;GCN4-lacZ, TRP1&gt;</i><br>pCF104 (sc <i>tif11-FGNAD<sub>133-137</sub>AAAAA-FL, LEU2</i> )      |
| CFY619 | <i>MATa ura3-52 leu2-3 leu2-112 trp1Δ63 gcn2Δ tif11Δ &lt;GCN4-lacZ, TRP1&gt;</i><br>pCF105 (sc <i>tif11-EDDEE<sub>138-142</sub>AAAAA-FL, LEU2</i> )      |
| CFY621 | <i>MATa ura3-52 leu2-3 leu2-112 trp1Δ63 gcn2Δ tif11Δ &lt;GCN4-lacZ, TRP1&gt;</i><br>pCF106 (sc <i>tif11-GEDEEL<sub>143-148</sub>AAAAA-FL, LEU2</i> )     |
| CFY623 | <i>MATa ura3-52 leu2-3 leu2-112 trp1Δ63 gcn2Δ tif11Δ &lt;GCN4-lacZ, TRP1&gt;</i><br>pCF94 (sc <i>tif11-DIDDI<sub>149-153</sub>AAAAA-FL, LEU2</i> )       |
